# Supplementary material
Source: PubMed Central journal article supplement (PMC6711378)
Supplement: NIHMS1528633-supplement-Supplemental_Material.pdf [file NIHMS1528633-supplement-Supplemental_Material.pdf]

## SUPPLEMENTAL MATERIAL

**Supplemental Table I. Participants for each clinical site for measure development and validation**

| <b>Site</b>                                                                    | <b>Location</b>  | <b>Region*</b> | <b>Number of focus group participants for measure development</b> | <b>Number of clinician participants for measure development</b> | <b>Number of longitudinal participants for measure validation</b> |
|--------------------------------------------------------------------------------|------------------|----------------|-------------------------------------------------------------------|-----------------------------------------------------------------|-------------------------------------------------------------------|
| Baylor Heart and Vascular Institute                                            | Dallas, TX       | South          | 0                                                                 | 0                                                               | 30                                                                |
| Dartmouth-Hitchcock Medical Center                                             | Lebanon, NH      | Northeast      | 14                                                                | 5                                                               | 0                                                                 |
| Maine Medical Center                                                           | Portland, ME     | Northeast      | 0                                                                 | 0                                                               | 7                                                                 |
| Mayo Clinic                                                                    | Rochester, MN    | Midwest        | 16                                                                | 0                                                               | 0                                                                 |
| Northwestern Memorial Hospital                                                 | Chicago, IL      | Midwest        | 16                                                                | 0                                                               | 14                                                                |
| Oregon Health & Science University Hospital                                    | Portland, OR     | Pacific        | 15                                                                | 5                                                               | 15                                                                |
| University of Alabama at Birmingham Hospital and affiliated outpatient clinics | Birmingham, AL   | South          | 0                                                                 | 0                                                               | 8                                                                 |
| Hospital of the University of Pennsylvania                                     | Philadelphia, PA | Northeast      | 0                                                                 | 0                                                               | 1                                                                 |

\*Regions are Census Bureau designations.

**Supplemental Table II. Survey eligibility windows for longitudinal sample, by treatment type and time point**

|                                                                                                             | Baseline                                                                         |                                       | Follow-up                              |                                       |
|-------------------------------------------------------------------------------------------------------------|----------------------------------------------------------------------------------|---------------------------------------|----------------------------------------|---------------------------------------|
|                                                                                                             | Eligible date                                                                    | Cut-off                               | Eligible date*                         | Cut-off                               |
| Initiation of guideline-directed medical therapy after new heart failure diagnosis or first hospitalization | At time of diagnosis of new onset heart failure or date of first hospitalization | 2 weeks after diagnosis or discharge  | 76 days after diagnosis or discharge   | 4 months after diagnosis or discharge |
| Cardiac Rehabilitation                                                                                      | 2 weeks before first rehab appointment                                           | 2 weeks after first rehab appointment | 2 weeks before final rehab appointment | 1 month after final rehab appointment |
| Cardiac Resynchronization Therapy                                                                           | 1 month before insertion                                                         | Day before insertion                  | 76 days after insertion date           | 4 months after insertion              |
| Left Ventricular Assist Device                                                                              |                                                                                  |                                       |                                        |                                       |
| Hospitalization primarily for Heart Failure                                                                 | Upon admission                                                                   | 2 weeks after discharge               | 76 days after discharge                | 4 months after discharge              |

\*A 76-day follow-up timeline (3 months minus 2 weeks) was selected because many patients were scheduled to return to the clinic for 3-month follow-up, and this allowed some flexibility.

**Supplemental Table III. The PROMIS-Plus-HF profile measure**

**A. Physical**

| <b>Instrument</b> | <b>Item</b>                                                                                                                                                                 | <b>Responses and Scores</b>                                                                                                                          |
|-------------------|-----------------------------------------------------------------------------------------------------------------------------------------------------------------------------|------------------------------------------------------------------------------------------------------------------------------------------------------|
| <b>Dyspnea</b>    |                                                                                                                                                                             |                                                                                                                                                      |
| Existing PROMIS   | Over the past 7 days, how short of breath did you get with each of these activities?: Walking 50 steps/paces on flat ground at a normal speed without stopping              | 1=No shortness of breath, 2=Mildly short of breath, 3=Moderately short of breath, 4=Severely short of breath, 5=I did not do this in the past 7 days |
| Existing PROMIS   | Over the past 7 days, how short of breath did you get with each of these activities?: Lifting something weighing 10-20 lbs. (about 4.5-9 kg, like a large bag of groceries) | 1=No shortness of breath, 2=Mildly short of breath, 3=Moderately short of breath, 4=Severely short of breath, 5=I did not do this in the past 7 days |
| Existing PROMIS   | Over the past 7 days, how short of breath did you get with each of these activities?: Walking (faster than your usual speed) for ½ mile (almost 1 km) without stopping      | 1=No shortness of breath, 2=Mildly short of breath, 3=Moderately short of breath, 4=Severely short of breath, 5=I did not do this in the past 7 days |
| Existing PROMIS   | Over the past 7 days, how short of breath did you get with each of these activities?: Walking 10 steps/paces on flat ground at a normal speed without stopping              | 1=No shortness of breath, 2=Mildly short of breath, 3=Moderately short of breath, 4=Severely short of breath, 5=I did not do this in the past 7 days |
| Existing PROMIS   | Over the past 7 days, how short of breath did you get with each of these activities?: Walking up 5 stairs without stopping                                                  | 1=No shortness of breath, 2=Mildly short of breath, 3=Moderately short of breath, 4=Severely short of breath, 5=I did not do this in the past 7 days |
| Existing PROMIS   | Over the past 7 days, how short of breath did you get with each of these activities?: Walking up 10 stairs (1 flight) without stopping                                      | 1=No shortness of breath, 2=Mildly short of breath, 3=Moderately short of breath, 4=Severely short of breath, 5=I did not do this in the past 7 days |

| <b>Instrument</b> | <b>Item</b>                                                                                                                                                                                 | <b>Responses and Scores</b>                                                                                                                          |
|-------------------|---------------------------------------------------------------------------------------------------------------------------------------------------------------------------------------------|------------------------------------------------------------------------------------------------------------------------------------------------------|
| Existing PROMIS   | Over the past 7 days, how short of breath did you get with each of these activities?: Lifting something weighing less than 5 lbs. (about 2 kg, like a houseplant)                           | 1=No shortness of breath, 2=Mildly short of breath, 3=Moderately short of breath, 4=Severely short of breath, 5=I did not do this in the past 7 days |
| Existing PROMIS   | Over the past 7 days, how short of breath did you get with each of these activities?: Lifting something weighing 5-10 lbs. (about 2-4.5 kg, like a basket of clothes)                       | 1=No shortness of breath, 2=Mildly short of breath, 3=Moderately short of breath, 4=Severely short of breath, 5=I did not do this in the past 7 days |
| Existing PROMIS   | Over the past 7 days, how short of breath did you get with each of these activities?: Lifting something weighing more than 20 lbs. (about 9 kg, like a medium-sized suitcase)               | 1=No shortness of breath, 2=Mildly short of breath, 3=Moderately short of breath, 4=Severely short of breath, 5=I did not do this in the past 7 days |
| Existing PROMIS   | Over the past 7 days, how short of breath did you get with each of these activities?: Carrying something weighing less than 5 lbs. (about 2 kg, like a houseplant) from one room to another | 1=No shortness of breath, 2=Mildly short of breath, 3=Moderately short of breath, 4=Severely short of breath, 5=I did not do this in the past 7 days |
| <b>Fatigue</b>    |                                                                                                                                                                                             |                                                                                                                                                      |
| Existing PROMIS   | In the past 7 days... To what degree did you have to push yourself to get things done because of your fatigue?                                                                              | 1=Not at all, 2=A little bit, 3=Somewhat, 4=Quite a bit, 5=Very much                                                                                 |
| Existing PROMIS   | In the past 7 days... How often did your fatigue make you feel slowed down in your thinking?                                                                                                | 1=Never, 2=Rarely, 3=Sometimes, 4=Often, 5=Always                                                                                                    |
| Existing PROMIS   | In the past 7 days... How often did you have to limit your social activities because of your fatigue?                                                                                       | 1=Never, 2=Rarely, 3=Sometimes, 4=Often, 5=Always                                                                                                    |
| Existing PROMIS   | In the past 7 days... How often were you too tired to do your household chores?                                                                                                             | 1=Never, 2=Rarely, 3=Sometimes, 4=Often, 5=Always                                                                                                    |
| Existing PROMIS   | In the past 7 days... How often did you run out of energy?                                                                                                                                  | 1=Never, 2=Rarely, 3=Sometimes, 4=Often, 5=Always                                                                                                    |

| <b>Instrument</b>               | <b>Item</b>                                                                                               | <b>Responses and Scores</b>                                          |
|---------------------------------|-----------------------------------------------------------------------------------------------------------|----------------------------------------------------------------------|
| Existing PROMIS                 | In the past 7 days... How often did you feel tired?                                                       | 1=Never, 2=Rarely, 3=Sometimes, 4=Often, 5=Always                    |
| Existing PROMIS                 | During the past 7 days... I feel weak all over                                                            | 1=Not at all, 2=A little bit, 3=Somewhat, 4=Quite a bit, 5=Very much |
| Existing PROMIS                 | During the past 7 days... I feel tired                                                                    | 1=Not at all, 2=A little bit, 3=Somewhat, 4=Quite a bit, 5=Very much |
| Existing PROMIS                 | During the past 7 days... I have energy                                                                   | 5=Not at all, 4=A little bit, 3=Somewhat, 2=Quite a bit, 1=Very much |
| Existing PROMIS                 | During the past 7 days... I am able to do my usual activities                                             | 5=Not at all, 4=A little bit, 3=Somewhat, 2=Quite a bit, 1=Very much |
| New PROMIS                      | In the past 7 days... How often did you need to take breaks to finish daily tasks?                        | 1=Never, 2=Rarely, 3=Sometimes, 4=Often, 5=Always                    |
| <b>Health Behavior Outcomes</b> |                                                                                                           |                                                                      |
| New PROMIS                      | In the past 7 days... Were you able to control your salt intake?                                          | 1=Never, 2=Rarely, 3=Sometimes, 4=Often, 5=Always                    |
| New PROMIS                      | In the past 7 days... Were you able to keep a healthy diet?                                               | 1=Never, 2=Rarely, 3=Sometimes, 4=Often, 5=Always                    |
| New PROMIS                      | In the past 7 days... Were you able to control your weight?                                               | 1=Not at all, 2=A little bit, 3=Somewhat, 4=Quite a bit, 5=Very much |
| <b>Pain Interference</b>        |                                                                                                           |                                                                      |
| Existing PROMIS                 | In the past 7 days... How much did pain interfere with your ability to participate in leisure activities? | 1=Not at all, 2=A little bit, 3=Somewhat, 4=Quite a bit, 5=Very much |
| Existing PROMIS                 | In the past 7 days... How much did pain interfere with your ability to concentrate?                       | 1=Not at all, 2=A little bit, 3=Somewhat, 4=Quite a bit, 5=Very much |
| <b>Physical Function</b>        |                                                                                                           |                                                                      |
| Existing PROMIS                 | Does your health now limit you in bending, kneeling, or stooping?                                         | 5=Not at all, 4=Very little, 3=Somewhat, 2=Quite a lot, 1=Cannot do  |
| Existing PROMIS                 | Does your health now limit you in doing heavy work around the house like                                  | 5=Not at all, 4=Very little, 3=Somewhat, 2=Quite a lot, 1=Cannot do  |

| <b>Instrument</b>        | <b>Item</b>                                                                                               | <b>Responses and Scores</b>                                                                                          |
|--------------------------|-----------------------------------------------------------------------------------------------------------|----------------------------------------------------------------------------------------------------------------------|
|                          | scrubbing floors, or lifting or moving heavy furniture?                                                   |                                                                                                                      |
| Existing PROMIS          | Are you able to push open a heavy door?                                                                   | 5=Without any difficulty, 4=With a little difficulty, 3=With some difficulty, 2=With much difficulty, 1=Unable to do |
| Existing PROMIS          | Are you able to go for a walk of at least 15 minutes?                                                     | 5=Without any difficulty, 4=With a little difficulty, 3=With some difficulty, 2=With much difficulty, 1=Unable to do |
| Existing PROMIS          | Does your health now limit you in going OUTSIDE the home, for example to shop or visit a doctor's office? | 5=Not at all, 4=Very little, 3=Somewhat, 2=Quite a lot, 1=Cannot do                                                  |
| Existing PROMIS          | Are you able to walk a block (about 100 m) on flat ground?                                                | 5=Without any difficulty, 4=With a little difficulty, 3=With some difficulty, 2=With much difficulty, 1=Unable to do |
| Existing PROMIS          | Are you able to run 100 yards (100 m)?                                                                    | 5=Without any difficulty, 4=With a little difficulty, 3=With some difficulty, 2=With much difficulty, 1=Unable to do |
| Existing PROMIS          | Are you able to walk up and down two steps?                                                               | 5=Without any difficulty, 4=With a little difficulty, 3=With some difficulty, 2=With much difficulty, 1=Unable to do |
| Existing PROMIS          | Does your health now limit you in climbing one flight of stairs?                                          | 5=Not at all, 4=Very little, 3=Somewhat, 2=Quite a lot, 1=Cannot do                                                  |
| Existing PROMIS          | Does your health now limit you in walking about the house?                                                | 5=Not at all, 4=Very little, 3=Somewhat, 2=Quite a lot, 1=Cannot do                                                  |
| <b>Sleep Disturbance</b> |                                                                                                           |                                                                                                                      |
| Existing PROMIS          | In the past 7 days... My sleep quality was...                                                             | 5=Very poor, 4=Poor, 3=Fair, 2=Good, 1=Very good                                                                     |
| Existing PROMIS          | In the past 7 days... I got enough sleep.                                                                 | 5=Never, 4=Rarely, 3=Sometimes, 2=Often, 1=Always                                                                    |
| Existing PROMIS          | In the past 7 days... I had a problem with my sleep.                                                      | 1=Not at all, 2=A little bit, 3=Somewhat, 4=Quite a bit, 5=Very much                                                 |

| <b>Instrument</b> | <b>Item</b>                                                       | <b>Responses and Scores</b>                                          |
|-------------------|-------------------------------------------------------------------|----------------------------------------------------------------------|
| Existing PROMIS   | In the past 7 days... I had difficulty falling asleep.            | 1=Not at all, 2=A little bit, 3=Somewhat, 4=Quite a bit, 5=Very much |
| Existing PROMIS   | In the past 7 days... I tried hard to get to sleep.               | 1=Not at all, 2=A little bit, 3=Somewhat, 4=Quite a bit, 5=Very much |
| Existing PROMIS   | In the past 7 days... I had trouble sleeping.                     | 1=Never, 2=Rarely, 3=Sometimes, 4=Often, 5=Always                    |
| <b>Symptoms</b>   |                                                                   |                                                                      |
| New PROMIS        | In the past 7 days... Did you feel dizzy or lightheaded?          | 1=Never, 2=Rarely, 3=Sometimes, 4=Often, 5=Always                    |
| New PROMIS        | In the past 7 days... Did you have chest pain?                    | 1=Never, 2=Rarely, 3=Sometimes, 4=Often, 5=Always                    |
| New PROMIS        | In the past 7 days... Did you have swelling in your feet or legs? | 1=Never, 2=Rarely, 3=Sometimes, 4=Often, 5=Always                    |

## **B. Mental**

| <b>Instrument</b> | <b>Item</b>                                                                   | <b>Responses and Scores</b>                       |
|-------------------|-------------------------------------------------------------------------------|---------------------------------------------------|
| <b>Anger</b>      |                                                                               |                                                   |
| New PROMIS        | In the past 7 days... I felt frustrated by my health.                         | 1=Never, 2=Rarely, 3=Sometimes, 4=Often, 5=Always |
| <b>Anxiety</b>    |                                                                               |                                                   |
| New PROMIS        | In the past 7 days... I worried about losing my independence.                 | 1=Never, 2=Rarely, 3=Sometimes, 4=Often, 5=Always |
| New PROMIS        | In the past 7 days... I worried about fainting.                               | 1=Never, 2=Rarely, 3=Sometimes, 4=Often, 5=Always |
| New PROMIS        | In the past 7 days... I worried that I would get swelling in my feet or legs. | 1=Never, 2=Rarely, 3=Sometimes, 4=Often, 5=Always |
| New PROMIS        | In the past 7 days... I worried that my health would get worse                | 1=Never, 2=Rarely, 3=Sometimes, 4=Often, 5=Always |
| New PROMIS        | In the past 7 days... I worried about dying.                                  | 1=Never, 2=Rarely, 3=Sometimes, 4=Often, 5=Always |

| <b>Instrument</b>          | <b>Item</b>                                                                                                     | <b>Responses and Scores</b>                                                                                                |
|----------------------------|-----------------------------------------------------------------------------------------------------------------|----------------------------------------------------------------------------------------------------------------------------|
| <b>Cognitive Abilities</b> |                                                                                                                 |                                                                                                                            |
| Existing PROMIS            | In the past 7 days... I have been able to bring to mind words that I wanted to use while talking to someone     | 1=Not at all, 2=A little bit, 3=Somewhat, 4=Quite a bit, 5=Very much                                                       |
| Existing PROMIS            | In the past 7 days... I have been able to concentrate                                                           | 1=Not at all, 2=A little bit, 3=Somewhat, 4=Quite a bit, 5=Very much                                                       |
| Existing PROMIS            | In the past 7 days... My ability to concentrate has been good                                                   | 1=Not at all, 2=A little bit, 3=Somewhat, 4=Quite a bit, 5=Very much                                                       |
| <b>Cognitive Function</b>  |                                                                                                                 |                                                                                                                            |
| Existing PROMIS            | In the past 7 days... My thinking has been slow                                                                 | 5=Never, 4=Rarely (Once), 3=Sometimes (Two or three times), 2=Often (About once a day), 1=Very often (Several times a day) |
| Existing PROMIS            | In the past 7 days... I have had to work really hard to pay attention or I would make a mistake                 | 5=Never, 4=Rarely (Once), 3=Sometimes (Two or three times), 2=Often (About once a day), 1=Very often (Several times a day) |
| Existing PROMIS            | In the past 7 days... I have been upset about my problems with memory, concentration, or making mental mistakes | 5=Never, 4=Rarely (Once), 3=Sometimes (Two or three times), 2=Often (About once a day), 1=Very often (Several times a day) |
| <b>Depression</b>          |                                                                                                                 |                                                                                                                            |
| Existing PROMIS            | In the past 7 days... I felt helpless                                                                           | 1=Never, 2=Rarely, 3=Sometimes, 4=Often, 5=Always                                                                          |
| Existing PROMIS            | In the past 7 days... I felt sad                                                                                | 1=Never, 2=Rarely, 3=Sometimes, 4=Often, 5=Always                                                                          |
| Existing PROMIS            | In the past 7 days... I felt that I wanted to give up on everything                                             | 1=Never, 2=Rarely, 3=Sometimes, 4=Often, 5=Always                                                                          |
| Existing PROMIS            | In the past 7 days... I felt depressed                                                                          | 1=Never, 2=Rarely, 3=Sometimes, 4=Often, 5=Always                                                                          |
| Existing PROMIS            | In the past 7 days... I felt unhappy                                                                            | 1=Never, 2=Rarely, 3=Sometimes, 4=Often, 5=Always                                                                          |
| Existing PROMIS            | In the past 7 days... I felt hopeless                                                                           | 1=Never, 2=Rarely, 3=Sometimes, 4=Often, 5=Always                                                                          |



| <b>Instrument</b>        | <b>Item</b>                                                                                 | <b>Responses and Scores</b>                                          |
|--------------------------|---------------------------------------------------------------------------------------------|----------------------------------------------------------------------|
| <b>Illness Burden</b>    |                                                                                             |                                                                      |
| New PROMIS               | In the past 7 days... Did you feel pressure to lose weight?                                 | 1=Not at all, 2=A little bit, 3=Somewhat, 4=Quite a bit, 5=Very much |
| New PROMIS               | In the past 7 days... Did you feel burdened by having to monitor you health?                | 1=Not at all, 2=A little bit, 3=Somewhat, 4=Quite a bit, 5=Very much |
| New PROMIS               | In the past 7 days... Did you feel burdened by having to monitor your weight?               | 1=Not at all, 2=A little bit, 3=Somewhat, 4=Quite a bit, 5=Very much |
| New PROMIS               | In the past 7 days... Did you feel burdened by restrictions on what you could eat or drink? | 1=Not at all, 2=A little bit, 3=Somewhat, 4=Quite a bit, 5=Very much |
| <b>Life Satisfaction</b> |                                                                                             |                                                                      |
| New PROMIS               | Does your health now limit you in achieving your goals?                                     | 5=Not at all, 4=A little bit, 3=Somewhat, 2=Quite a bit, 1=Very much |
| New PROMIS               | In the past 7 days... I am able to enjoy life.                                              | 1=Not at all, 2=A little bit, 3=Somewhat, 4=Quite a bit, 5=Very much |

### C. Social

| <b>Instrument</b>                                            | <b>Item</b>                                                                       | <b>Responses and Scores</b>                         |
|--------------------------------------------------------------|-----------------------------------------------------------------------------------|-----------------------------------------------------|
| <b>Ability to Participate in Social Roles and Activities</b> |                                                                                   |                                                     |
| Existing PROMIS                                              | I have trouble doing my regular daily work around the house                       | 5=Never, 4=Rarely, 3=Sometimes, 2=Usually, 1=Always |
| Existing PROMIS                                              | I have trouble meeting the needs of my family                                     | 5=Never, 4=Rarely, 3=Sometimes, 2=Usually, 1=Always |
| Existing PROMIS                                              | I am limited in doing my work (include work at home)                              | 5=Never, 4=Rarely, 3=Sometimes, 2=Usually, 1=Always |
| Existing PROMIS                                              | I have trouble doing everything for my family that I feel I should do             | 5=Never, 4=Rarely, 3=Sometimes, 2=Usually, 1=Always |
| Existing PROMIS                                              | I have trouble accomplishing my usual work (include work at home)                 | 5=Never, 4=Rarely, 3=Sometimes, 2=Usually, 1=Always |
| Existing PROMIS                                              | I have trouble doing everything for work that I want to do (include work at home) | 5=Never, 4=Rarely, 3=Sometimes, 2=Usually, 1=Always |

| <b>Instrument</b>                                    | <b>Item</b>                                                                                          | <b>Responses and Scores</b>                                          |
|------------------------------------------------------|------------------------------------------------------------------------------------------------------|----------------------------------------------------------------------|
| <b>Independence</b>                                  |                                                                                                      |                                                                      |
| New PROMIS                                           | In the past 7 days... Were you dependent on others to get things done?                               | 5=Not at all, 4=A little bit, 3=Somewhat, 2=Quite a bit, 1=Very much |
| New PROMIS                                           | Does your health now limit you in doing things that make you feel independent?                       | 5=Not at all, 4=A little bit, 3=Somewhat, 2=Quite a bit, 1=Very much |
| New PROMIS                                           | In the past 7 days... I was satisfied with my ability to be independent.                             | 1=Not at all, 2=A little bit, 3=Somewhat, 4=Quite a bit, 5=Very much |
| <b>Satisfaction with Social Roles and Activities</b> |                                                                                                      |                                                                      |
| Existing PROMIS                                      | I am satisfied with my ability to maintain friendships                                               | 1=Not at all, 2=A little bit, 3=Somewhat, 4=Quite a bit, 5=Very much |
| Existing PROMIS                                      | I am satisfied with how much work I can do (include work at home)                                    | 1=Not at all, 2=A little bit, 3=Somewhat, 4=Quite a bit, 5=Very much |
| Existing PROMIS                                      | I am satisfied with my ability to work (include work at home)                                        | 1=Not at all, 2=A little bit, 3=Somewhat, 4=Quite a bit, 5=Very much |
| Existing PROMIS                                      | I am satisfied with my ability to do household chores/tasks                                          | 1=Not at all, 2=A little bit, 3=Somewhat, 4=Quite a bit, 5=Very much |
| Existing PROMIS                                      | I am satisfied with my ability to do things for fun at home (like reading, listening to music, etc.) | 1=Not at all, 2=A little bit, 3=Somewhat, 4=Quite a bit, 5=Very much |
| Existing PROMIS                                      | I am satisfied with the amount of time I spend performing my daily routines                          | 1=Not at all, 2=A little bit, 3=Somewhat, 4=Quite a bit, 5=Very much |
| <b>Social Isolation</b>                              |                                                                                                      |                                                                      |
| Existing PROMIS                                      | People get the wrong idea about my situation                                                         | 1=Never, 2=Rarely, 3=Sometimes, 4=Usually, 5=Always                  |
| Existing PROMIS                                      | I feel left out                                                                                      | 1=Never, 2=Rarely, 3=Sometimes, 4=Usually, 5=Always                  |

**Supplemental Table IV. Measure statistics of the cross-sectional sample**

| Domain Measure                 | N   | Missing | Mean  | Median | SD   | Skewness | Kurtosis | Observed |         |
|--------------------------------|-----|---------|-------|--------|------|----------|----------|----------|---------|
|                                |     |         |       |        |      |          |          | Minimum  | Maximum |
| <b>PHYSICAL</b>                |     |         |       |        |      |          |          |          |         |
| Dyspnea                        | 589 | 11      | 24.38 | 25.0   | 7.32 | -0.21    | -0.69    | 10       | 40      |
| Fatigue                        | 600 | 0       | 31.89 | 32.0   | 7.60 | 0.20     | 0.54     | 11       | 55      |
| Health Behavior Outcomes       | 600 | 0       | 9.53  | 9.0    | 2.34 | 0.23     | 0.29     | 3        | 15      |
| Pain Interference              | 600 | 0       | 5.22  | 5.0    | 1.84 | 0.12     | -0.06    | 2        | 10      |
| Physical Function              | 600 | 0       | 33.18 | 33.0   | 7.43 | -0.06    | 0.27     | 10       | 50      |
| Sleep Disturbance              | 598 | 2       | 16.86 | 17.0   | 4.99 | 0.09     | 0.26     | 6        | 30      |
| Symptoms                       | 599 | 1       | 7.81  | 8.0    | 2.37 | -0.08    | 0.00     | 3        | 15      |
| <b>MENTAL</b>                  |     |         |       |        |      |          |          |          |         |
| Anger                          | 600 | 0       | 2.95  | 3.0    | 1.12 | 0.07     | -0.62    | 1        | 5       |
| Anxiety                        | 600 | 0       | 13.58 | 14.0   | 4.41 | 0.15     | -0.21    | 5        | 25      |
| Cognitive Abilities            | 600 | 0       | 9.30  | 9.0    | 2.44 | 0.35     | 0.17     | 3        | 15      |
| Cognitive Function             | 600 | 0       | 10.19 | 10.0   | 2.86 | -0.29    | -0.23    | 3        | 15      |
| Depression                     | 600 | 0       | 15.32 | 15.0   | 5.50 | 0.22     | -0.28    | 6        | 30      |
| Illness Burden                 | 599 | 1       | 11.00 | 11.0   | 3.72 | 0.14     | -0.09    | 4        | 20      |
| Life Satisfaction              | 600 | 0       | 5.90  | 6.0    | 1.77 | 0.34     | -0.09    | 2        | 10      |
| <b>SOCIAL</b>                  |     |         |       |        |      |          |          |          |         |
| Ability to Participate in SR&A | 600 | 0       | 18.63 | 18.0   | 4.91 | -0.17    | 0.42     | 6        | 30      |
| Independence                   | 600 | 0       | 9.45  | 9.0    | 2.56 | 0.04     | 0.35     | 3        | 15      |
| Satisfaction with SR&A         | 600 | 0       | 18.55 | 18.0   | 4.95 | -0.06    | 0.13     | 6        | 30      |
| Social Isolation               | 600 | 0       | 5.65  | 6.0    | 1.81 | 0.07     | 0.01     | 2        | 10      |

PROMIS = Patient-Reported Outcomes Measurement Information System, SD = Standard Deviation, SR&A = Social Roles and Activities.

**Supplemental Table V. Test-retest reliability of PROMIS-Plus-HF domains and validity measures using cross-sectional data**

| <b>Domain Measure</b>                            | <b># items</b> | <b>ICC:<br/>Systematic +<br/>Random</b> | <b>ICC:<br/>Random</b> |
|--------------------------------------------------|----------------|-----------------------------------------|------------------------|
| <b>PHYSICAL</b>                                  |                |                                         |                        |
| Dyspnea                                          | 10             | 0.98                                    | 0.98                   |
| Fatigue                                          | 11             | 0.98                                    | 0.99                   |
| Health Behavior Outcomes                         | 3              | 0.98                                    | 0.98                   |
| Pain Interference                                | 2              | 0.97                                    | 0.97                   |
| Physical Function                                | 10             | 0.98                                    | 0.98                   |
| Sleep Disturbance                                | 6              | 0.98                                    | 0.98                   |
| Symptoms                                         | 3              | 0.97                                    | 0.97                   |
| <b>MENTAL</b>                                    |                |                                         |                        |
| Anger                                            | 1              | 0.97                                    | 0.97                   |
| Anxiety                                          | 5              | 0.99                                    | 0.99                   |
| Cognitive Ability                                | 3              | 0.97                                    | 0.97                   |
| Cognitive Function                               | 3              | 0.98                                    | 0.98                   |
| Depression                                       | 6              | 0.97                                    | 0.97                   |
| Illness Burden                                   | 4              | 0.98                                    | 0.98                   |
| Life Satisfaction                                | 2              | 0.96                                    | 0.96                   |
| <b>SOCIAL</b>                                    |                |                                         |                        |
| Ability to Engage in Social Roles and Activities | 6              | 0.97                                    | 0.97                   |
| Independence                                     | 3              | 0.90                                    | 0.90                   |
| Satisfaction with Social Roles and Activities    | 6              | 0.99                                    | 0.99                   |
| Social Isolation                                 | 2              | 0.95                                    | 0.95                   |

ICC = intraclass correlation coefficient

PROMIS = Patient-Reported Outcomes Measurement Information System

**Supplemental Table VI. Categorical confirmatory factor analysis modeling results using cross-sectional data**

| <b>Domain Measure*</b>                           | <b># items</b> | <b>CFI</b> | <b>TLI</b> | <b>RMSEA</b> | <b>WRMR</b> |
|--------------------------------------------------|----------------|------------|------------|--------------|-------------|
| Ability to Engage in Social Roles and Activities | 6              | 0.99       | 0.98       | 0.14         | 0.93        |
| Anxiety                                          | 5              | 0.99       | 0.98       | 0.08         | 0.55        |
| Depression                                       | 6              | 0.99       | 0.99       | 0.11         | 0.74        |
| Dyspnea                                          | 10             | 0.98       | 0.97       | 0.11         | 1.33        |
| Fatigue                                          | 11             | 0.89       | 0.86       | 0.21         | 2.38        |
| Illness Burden                                   | 4              | 0.99       | 0.98       | 0.12         | 0.45        |
| Physical Function                                | 10             | 0.91       | 0.89       | 0.19         | 2.26        |
| Satisfaction with Social Roles and Activities    | 6              | 0.97       | 0.96       | 0.17         | 1.27        |
| Sleep Disturbance                                | 6              | 0.92       | 0.86       | 0.31         | 2.78        |

\*Only domains with four or more items were analyzed

CFI = Comparative Fit Index

RMSEA = Root Mean Square Error for Approximation

TLI = Tucker-Lewis Index

WRMR = Weighted Root Mean Square Residual

**Supplemental Table VII. Differential item functioning results using cross-sectional data**

| <b>Domain Measure*</b>                           | <b># items</b> | <b>DIF by Sex<br/>(Male vs.<br/>Female)</b> | <b>DIF by Age<br/>(≤55 vs. &gt;55)</b> | <b>DIF by Education<br/>(completed<br/>college or not)</b> |
|--------------------------------------------------|----------------|---------------------------------------------|----------------------------------------|------------------------------------------------------------|
| Ability to Engage in Social Roles and Activities | 6              | No                                          | No                                     | No                                                         |
| Anxiety                                          | 5              | No                                          | No                                     | No                                                         |
| Depression                                       | 6              | No                                          | No                                     | No                                                         |
| Dyspnea                                          | 10             | No                                          | No                                     | No                                                         |
| Fatigue                                          | 11             | No                                          | No                                     | No                                                         |
| Illness Burden                                   | 4              | No                                          | No                                     | No                                                         |
| Physical Function                                | 10             | No                                          | No                                     | No                                                         |
| Satisfaction with Social Roles and Activities    | 6              | No                                          | No                                     | No                                                         |
| Sleep Disturbance                                | 6              | No                                          | No                                     | No                                                         |

“No” indicates that there was no impactful DIF

\*Only domains with four or more items were analyzed

DIF = Differential Item Functioning

**Supplemental Table VIII. ANOVA of PROMIS domains by PROMIS Global Health Physical (Low vs. High) using cross-sectional data**

| Domain Measure           | GH Physical Group | N   | Mean  | SD   | 95% CI for Mean |             | ANOVA p value | Result Interpretation                   |
|--------------------------|-------------------|-----|-------|------|-----------------|-------------|---------------|-----------------------------------------|
|                          |                   |     |       |      | Lower Bound     | Upper Bound |               |                                         |
| <b>PHYSICAL</b>          |                   |     |       |      |                 |             |               |                                         |
| Dyspnea                  | Low               | 168 | 28.76 | 6.38 | 27.79           | 29.73       | <.001         | High GH Physical = better domain status |
|                          | High              | 115 | 17.27 | 6.24 | 16.12           | 18.42       |               |                                         |
| Fatigue                  | Low               | 174 | 38.05 | 6.91 | 37.01           | 39.08       | <.001         | High GH Physical = better domain status |
|                          | High              | 116 | 24.64 | 6.35 | 23.47           | 25.81       |               |                                         |
| Health Behavior Outcomes | Low               | 174 | 9.56  | 2.12 | 9.25            | 9.88        | 0.226         | No group difference                     |
|                          | High              | 116 | 9.94  | 3.17 | 9.36            | 10.52       |               |                                         |
| Pain Interference        | Low               | 174 | 6.41  | 1.74 | 6.15            | 6.67        | <.001         | High GH Physical = better domain status |
|                          | High              | 116 | 3.83  | 1.71 | 3.51            | 4.14        |               |                                         |
| Physical Function        | Low               | 174 | 27.82 | 6.60 | 26.83           | 28.80       | <.001         | High GH Physical = better domain status |
|                          | High              | 116 | 40.50 | 6.89 | 39.23           | 41.77       |               |                                         |
| Sleep Disturbance        | Low               | 174 | 19.55 | 4.92 | 18.81           | 20.28       | <.001         | High GH Physical = better domain status |
|                          | High              | 114 | 13.55 | 4.94 | 12.64           | 14.47       |               |                                         |
| Symptoms                 | Low               | 174 | 9.22  | 2.11 | 8.91            | 9.54        | <.001         | High GH Physical = better domain status |
|                          | High              | 115 | 5.63  | 2.31 | 5.21            | 6.06        |               |                                         |
| <b>MENTAL</b>            |                   |     |       |      |                 |             |               |                                         |
| Anger                    | Low               | 174 | 3.59  | 1.06 | 3.43            | 3.75        | <.001         | High GH Physical = better domain status |
|                          | High              | 116 | 2.27  | 1.12 | 2.06            | 2.47        |               |                                         |
| Anxiety                  | Low               | 174 | 16.26 | 4.25 | 15.63           | 16.90       | <.001         | High GH Physical = better domain status |
|                          | High              | 116 | 10.11 | 3.99 | 9.38            | 10.85       |               |                                         |
| Cognitive Abilities      | Low               | 174 | 8.92  | 2.17 | 8.60            | 9.24        | <.001         | High GH Physical = better domain status |
|                          | High              | 116 | 10.28 | 3.10 | 9.71            | 10.85       |               |                                         |
| Cognitive Function       | Low               | 174 | 8.66  | 3.01 | 8.20            | 9.11        | <.001         | High GH Physical = better domain status |
|                          | High              | 116 | 12.41 | 2.18 | 12.00           | 12.81       |               |                                         |
| Depression               | Low               | 174 | 18.71 | 4.90 | 17.98           | 19.45       | <.001         | High GH Physical = better domain status |
|                          | High              | 116 | 10.92 | 4.70 | 10.06           | 11.79       |               |                                         |
| Illness Burden           | Low               | 174 | 12.64 | 3.99 | 12.04           | 13.23       | <.001         |                                         |

|                           |      |     |       |      |       |       |       |                                         |
|---------------------------|------|-----|-------|------|-------|-------|-------|-----------------------------------------|
|                           | High | 115 | 8.81  | 3.63 | 8.14  | 9.48  |       | High GH Physical = better domain status |
| Life Satisfaction         | Low  | 174 | 4.95  | 1.47 | 4.73  | 5.17  | <.001 | High GH Physical = better domain status |
|                           | High | 116 | 7.28  | 1.95 | 6.93  | 7.64  |       |                                         |
| <b>SOCIAL</b>             |      |     |       |      |       |       |       |                                         |
| Ability to Engage in SR&A | Low  | 174 | 15.31 | 4.65 | 14.61 | 16.01 | <.001 | High GH Physical = better domain status |
|                           | High | 116 | 22.50 | 4.84 | 21.61 | 23.39 |       |                                         |
| Independence              | Low  | 174 | 7.80  | 2.49 | 7.43  | 8.18  | <.001 | High GH Physical = better domain status |
|                           | High | 116 | 11.51 | 2.43 | 11.06 | 11.96 |       |                                         |
| Satisfaction with SR&A    | Low  | 174 | 15.62 | 4.82 | 14.90 | 16.34 | <.001 | High GH Physical = better domain status |
|                           | High | 116 | 22.78 | 4.75 | 21.90 | 23.65 |       |                                         |
| Social Isolation          | Low  | 174 | 6.73  | 1.64 | 6.48  | 6.98  | <.001 | High GH Physical = better domain status |
|                           | High | 116 | 4.30  | 1.72 | 3.99  | 4.62  |       |                                         |

ANOVA = Analysis of Variance

CI = Confidence Interval

GH = PROMIS Global Health

PROMIS = Patient-Reported Outcomes Measurement Information System

SD = Standard Deviation

SR&A = Social Roles and Activities



**Supplemental Table IX. ANOVA of PROMIS domains by PROMIS Global Health Mental (Low vs. High) using cross-sectional data**

| Domain Measure           | GH Mental Group | N   | Mean  | SD   | 95% CI for Mean |             | ANOVA p value | Result Interpretation                 |
|--------------------------|-----------------|-----|-------|------|-----------------|-------------|---------------|---------------------------------------|
|                          |                 |     |       |      | Lower Bound     | Upper Bound |               |                                       |
| <b>PHYSICAL</b>          |                 |     |       |      |                 |             |               |                                       |
| Dyspnea                  | Low             | 201 | 27.55 | 6.56 | 26.63           | 28.46       | <.001         | High GH Mental = better domain status |
|                          | High            | 140 | 19.55 | 7.01 | 18.38           | 20.72       |               |                                       |
| Fatigue                  | Low             | 207 | 36.67 | 7.15 | 35.69           | 37.65       | <.001         | High GH Mental = better domain status |
|                          | High            | 143 | 27.45 | 7.84 | 26.15           | 28.74       |               |                                       |
| Health Behavior Outcomes | Low             | 207 | 9.43  | 2.06 | 9.14            | 9.71        | <.001         | High GH Mental = better domain status |
|                          | High            | 143 | 10.46 | 2.81 | 10.00           | 10.93       |               |                                       |
| Pain Interference        | Low             | 207 | 6.14  | 1.80 | 5.89            | 6.39        | <.001         | High GH Mental = better domain status |
|                          | High            | 143 | 4.27  | 1.92 | 3.95            | 4.58        |               |                                       |
| Physical Function        | Low             | 207 | 29.00 | 6.96 | 28.05           | 29.95       | <.001         | High GH Mental = better domain status |
|                          | High            | 143 | 37.90 | 7.24 | 36.70           | 39.09       |               |                                       |
| Sleep Disturbance        | Low             | 206 | 19.21 | 4.76 | 18.56           | 19.87       | <.001         | High GH Mental = better domain status |
|                          | High            | 142 | 14.56 | 5.42 | 13.66           | 15.46       |               |                                       |
| Symptoms                 | Low             | 207 | 8.94  | 2.18 | 8.64            | 9.24        | <.001         | High GH Mental = better domain status |
|                          | High            | 142 | 6.46  | 2.57 | 6.03            | 6.88        |               |                                       |
| <b>MENTAL</b>            |                 |     |       |      |                 |             |               |                                       |
| Anger                    | Low             | 207 | 3.54  | 1.04 | 3.39            | 3.68        | <.001         | High GH Mental = better domain status |
|                          | High            | 143 | 2.47  | 1.16 | 2.28            | 2.66        |               |                                       |
| Anxiety                  | Low             | 207 | 15.77 | 4.36 | 15.18           | 16.37       | <.001         | High GH Mental = better domain status |
|                          | High            | 143 | 11.24 | 4.33 | 10.52           | 11.95       |               |                                       |
| Cognitive Abilities      | Low             | 207 | 8.91  | 2.19 | 8.61            | 9.21        | <.001         | High GH Mental = better domain status |
|                          | High            | 143 | 10.33 | 3.02 | 9.83            | 10.83       |               |                                       |
| Cognitive Function       | Low             | 207 | 8.64  | 2.97 | 8.24            | 9.05        | <.001         | High GH Mental = better domain status |
|                          | High            | 143 | 12.10 | 2.53 | 11.69           | 12.52       |               |                                       |
| Depression               | Low             | 207 | 18.96 | 4.96 | 18.28           | 19.64       | <.001         | High GH Mental = better domain status |
|                          | High            | 143 | 11.24 | 4.80 | 10.45           | 12.04       |               |                                       |
| Illness Burden           | Low             | 207 | 12.67 | 3.94 | 12.13           | 13.21       | <.001         |                                       |

|                           |      |     |       |      |       |       |       |                                       |
|---------------------------|------|-----|-------|------|-------|-------|-------|---------------------------------------|
|                           | High | 142 | 9.18  | 3.57 | 8.59  | 9.78  |       | High GH Mental = better domain status |
| Life Satisfaction         | Low  | 207 | 5.03  | 1.48 | 4.83  | 5.23  | <.001 | High GH Mental = better domain status |
|                           | High | 143 | 7.18  | 1.86 | 6.87  | 7.49  |       |                                       |
| <b>SOCIAL</b>             |      |     |       |      |       |       |       |                                       |
| Ability to Engage in SR&A | Low  | 207 | 15.98 | 4.95 | 15.30 | 16.65 | <.001 | High GH Mental = better domain status |
|                           | High | 143 | 20.90 | 5.15 | 20.05 | 21.75 |       |                                       |
| Independence              | Low  | 207 | 8.16  | 2.42 | 7.83  | 8.50  | <.001 | High GH Mental = better domain status |
|                           | High | 143 | 10.87 | 2.68 | 10.42 | 11.31 |       |                                       |
| Satisfaction with SR&A    | Low  | 207 | 15.92 | 4.88 | 15.25 | 16.59 | <.001 | High GH Mental = better domain status |
|                           | High | 143 | 21.85 | 4.68 | 21.08 | 22.63 |       |                                       |
| Social Isolation          | Low  | 207 | 6.57  | 1.66 | 6.35  | 6.80  | <.001 | High GH Mental = better domain status |
|                           | High | 143 | 4.81  | 1.89 | 4.50  | 5.12  |       |                                       |

CI = Confidence Interval

GH = PROMIS Global Health

PROMIS = Patient-Reported Outcomes Measurement Information System

SD = Standard Deviation

SR&A = Social Roles and Activities

**Supplemental Table X. Confirmatory measure statistics using baseline data from 185 participants in the longitudinal sample**

| Domain Measure                 | N   | Missing | Mean  | Median | SD   | Skewness | Kurtosis | Observed |         |
|--------------------------------|-----|---------|-------|--------|------|----------|----------|----------|---------|
|                                |     |         |       |        |      |          |          | Minimum  | Maximum |
| <b>PHYSICAL</b>                |     |         |       |        |      |          |          |          |         |
| Dyspnea                        | 155 | 30      | 26.15 | 26.0   | 9.35 | -0.12    | -1.23    | 10       | 40      |
| Fatigue                        | 175 | 10      | 37.40 | 37.0   | 9.23 | -0.23    | -0.51    | 16       | 55      |
| Health Behavior Outcomes       | 180 | 5       | 10.73 | 11.0   | 2.66 | -0.37    | 0.16     | 3        | 15      |
| Pain Interference              | 179 | 6       | 5.22  | 5.0    | 2.45 | 0.17     | -1.03    | 2        | 10      |
| Physical Function              | 177 | 8       | 28.58 | 27.0   | 9.53 | 0.26     | -0.82    | 10       | 49      |
| Sleep Disturbance              | 180 | 5       | 19.33 | 19.0   | 6.43 | -0.10    | -0.89    | 6        | 30      |
| Symptoms                       | 180 | 5       | 8.03  | 8.0    | 2.88 | 0.34     | -0.38    | 3        | 15      |
| <b>MENTAL</b>                  |     |         |       |        |      |          |          |          |         |
| Anger                          | 181 | 4       | 3.34  | 3.0    | 1.11 | -0.29    | -0.39    | 1        | 5       |
| Anxiety                        | 179 | 6       | 13.41 | 13.0   | 4.58 | 0.43     | -0.31    | 5        | 25      |
| Cognitive Abilities            | 181 | 4       | 10.31 | 10.0   | 2.73 | -0.08    | -0.31    | 3        | 15      |
| Cognitive Function             | 182 | 3       | 10.93 | 12.0   | 3.28 | -0.59    | -0.51    | 3        | 15      |
| Depression                     | 178 | 7       | 13.98 | 13.5   | 5.75 | 0.53     | -0.37    | 6        | 30      |
| Illness Burden                 | 181 | 4       | 9.52  | 9.0    | 4.02 | 0.67     | -0.02    | 4        | 20      |
| Life Satisfaction              | 181 | 4       | 5.93  | 6.0    | 2.07 | 0.22     | -0.70    | 2        | 10      |
| <b>SOCIAL</b>                  |     |         |       |        |      |          |          |          |         |
| Ability to Participate in SR&A | 175 | 10      | 16.62 | 18.0   | 6.01 | -0.07    | -0.65    | 6        | 30      |
| Independence                   | 181 | 4       | 8.73  | 9.0    | 3.37 | -0.07    | -0.90    | 3        | 15      |
| Satisfaction with SR&A         | 179 | 6       | 17.20 | 17.0   | 6.16 | 0.38     | -0.66    | 6        | 30      |
| Social Isolation               | 179 | 6       | 5.67  | 6.0    | 2.03 | 0.03     | -0.40    | 2        | 10      |

PROMIS = Patient-Reported Outcomes Measurement Information System, SD = Standard Deviation, SR&A = Social Roles and Activities.

**Supplemental Table XI. Confirmatory internal consistency reliability testing of the PROMIS-Plus-HF measure using baseline data from 185 participants in the longitudinal sample**

| Domain Measure                                   | # items | alpha | <u>Inter-item Correlation</u> |      |      | <u>Item-adjusted Total Correlation</u> |      |
|--------------------------------------------------|---------|-------|-------------------------------|------|------|----------------------------------------|------|
|                                                  |         |       | Average                       | Min  | Max  | Min                                    | Max  |
| <b>PHYSICAL</b>                                  |         |       |                               |      |      |                                        |      |
| Dyspnea                                          | 10      | 0.96  | 0.68                          | 0.34 | 0.88 | 0.66                                   | 0.88 |
| Fatigue                                          | 11      | 0.93  | 0.57                          | 0.30 | 0.80 | 0.57                                   | 0.83 |
| Health Behavior Outcomes                         | 3       | 0.67  | 0.42                          | 0.23 | 0.57 | 0.38                                   | 0.64 |
| Pain Interference                                | 2       | 0.88  | 0.79                          | 0.79 | 0.79 | 0.79                                   | 0.79 |
| Physical Function                                | 10      | 0.92  | 0.55                          | 0.35 | 0.79 | 0.58                                   | 0.78 |
| Sleep Disturbance                                | 6       | 0.93  | 0.70                          | 0.58 | 0.89 | 0.72                                   | 0.88 |
| Symptoms                                         | 3       | 0.62  | 0.37                          | 0.23 | 0.53 | 0.33                                   | 0.55 |
| <b>MENTAL</b>                                    |         |       |                               |      |      |                                        |      |
| Anger                                            | 1       |       |                               |      |      |                                        |      |
| Anxiety                                          | 5       | 0.78  | 0.42                          | 0.27 | 0.54 | 0.48                                   | 0.66 |
| Cognitive Abilities                              | 3       | 0.63  | 0.39                          | 0.14 | 0.73 | 0.23                                   | 0.66 |
| Cognitive Function                               | 3       | 0.90  | 0.75                          | 0.73 | 0.76 | 0.79                                   | 0.81 |
| Depression                                       | 6       | 0.92  | 0.66                          | 0.54 | 0.81 | 0.71                                   | 0.84 |
| Illness Burden                                   | 4       | 0.80  | 0.51                          | 0.36 | 0.67 | 0.53                                   | 0.74 |
| Life Satisfaction                                | 2       | 0.68  | 0.53                          | 0.53 | 0.53 | 0.53                                   | 0.53 |
| <b>SOCIAL</b>                                    |         |       |                               |      |      |                                        |      |
| Ability to Engage in Social Roles and Activities | 6       | 0.94  | 0.73                          | 0.60 | 0.90 | 0.74                                   | 0.91 |
| Independence                                     | 3       | 0.74  | 0.49                          | 0.39 | 0.58 | 0.50                                   | 0.64 |

|                                               |   |      |      |      |      |      |      |
|-----------------------------------------------|---|------|------|------|------|------|------|
| Satisfaction with Social Roles and Activities | 6 | 0.88 | 0.54 | 0.32 | 0.71 | 0.46 | 0.76 |
| Social Isolation                              | 2 | 0.68 | 0.52 | 0.52 | 0.52 | 0.52 | 0.52 |

Alpha = Cronbach's alpha

**Supplemental Table XII. Confirmatory convergent validity testing using Pearson *r* and Spearman *rho* Correlations with baseline data from 185 participants in the longitudinal sample**

| <b>Measures</b>                                        | <b>Pearson <i>r</i>/Spearman <i>rho</i> coefficients<sup>†</sup></b> |
|--------------------------------------------------------|----------------------------------------------------------------------|
| Physical Function* and KCCQ: Physical Limitation       | 0.74/0.72                                                            |
| Symptoms* and KCCQ: Symptom Severity                   | -0.60/-0.61                                                          |
| Life Satisfaction* and KCCQ: Quality of Life           | 0.59/0.61                                                            |
| Satisfaction with SR&A* and KCCQ: Social Limitation    | 0.64/0.61                                                            |
| Ability to Engage in SR&A* and KCCQ: Social Limitation | 0.63/0.59                                                            |

\* Domains from the PROMIS-Plus-HF profile measure

<sup>†</sup> We defined expected convergent validity as *r* or *rho* > 0.60.

SR&A = Social Roles and Activities

KCCQ = Kansas City Cardiomyopathy Questionnaire

**Supplemental Table XIII. Confirmatory divergent validity testing using Pearson *r* and Spearman *rho* Correlations with baseline data from 185 participants in the longitudinal sample**

| Measures            | Pearson <i>r</i> /Spearman <i>rho</i> coefficients |                    |                         |                            |             |
|---------------------|----------------------------------------------------|--------------------|-------------------------|----------------------------|-------------|
|                     | Physical Function*                                 | Life Satisfaction* | Satisfaction with SR&A* | Ability to Engage in SR&A* | Symptoms*   |
| KCCQ: Self-Efficacy | 0.20/0.24                                          | 0.23/0.27          | 0.21/0.19               | 0.13/0.12                  | -0.23/.0.22 |

\* Domains from the PROMIS-Plus-HF profile measure

† We defined expected divergent validity as *r* or *rho* < 0.3.

SR&A = Social Roles and Activities

KCCQ = Kansas City Cardiomyopathy Questionnaire

**Supplemental Table XIV. ANOVA of PROMIS domains by PROMIS Global Health Physical (Low vs. High) using baseline data from 185 participants in the longitudinal sample**

| Domain Measure           | GH Physical Group | N  | Mean  | SD   | 95% CI for Mean |             | ANOVA p value | Result Interpretation                   |
|--------------------------|-------------------|----|-------|------|-----------------|-------------|---------------|-----------------------------------------|
|                          |                   |    |       |      | Lower Bound     | Upper Bound |               |                                         |
| <b>PHYSICAL</b>          |                   |    |       |      |                 |             |               |                                         |
| Dyspnea                  | Low               | 63 | 30.28 | 8.18 | 28.22           | 32.34       | <.001         | High GH Physical = better domain status |
|                          | High              | 38 | 19.32 | 9.16 | 16.31           | 22.33       |               |                                         |
| Fatigue                  | Low               | 80 | 42.68 | 7.34 | 41.04           | 44.31       | <.001         | High GH Physical = better domain status |
|                          | High              | 40 | 28.43 | 8.11 | 25.83           | 31.02       |               |                                         |
| Health Behavior Outcomes | Low               | 82 | 10.61 | 2.73 | 10.01           | 11.21       | 0.426         | No group difference                     |
|                          | High              | 40 | 11.05 | 3.11 | 10.05           | 12.05       |               |                                         |
| Pain Interference        | Low               | 82 | 6.41  | 2.21 | 5.93            | 6.90        | <.001         | High GH Physical = better domain status |
|                          | High              | 39 | 3.38  | 1.84 | 2.79            | 3.98        |               |                                         |
| Physical Function        | Low               | 82 | 23.40 | 7.73 | 21.70           | 25.10       | <.001         | High GH Physical = better domain status |
|                          | High              | 37 | 38.76 | 7.01 | 36.42           | 41.09       |               |                                         |
| Sleep Disturbance        | Low               | 82 | 22.04 | 5.34 | 20.86           | 23.21       | <.001         | High GH Physical = better domain status |
|                          | High              | 40 | 14.40 | 5.86 | 12.53           | 16.27       |               |                                         |
| Symptoms                 | Low               | 82 | 9.07  | 2.77 | 8.47            | 9.68        | <.001         | High GH Physical = better domain status |
|                          | High              | 40 | 6.43  | 2.24 | 5.71            | 7.14        |               |                                         |
| <b>MENTAL</b>            |                   |    |       |      |                 |             |               |                                         |
| Anger                    | Low               | 81 | 3.88  | 0.90 | 3.68            | 4.08        | <.001         | High GH Physical = better domain status |
|                          | High              | 40 | 2.45  | 0.99 | 2.13            | 2.77        |               |                                         |
| Anxiety                  | Low               | 81 | 15.47 | 4.54 | 14.47           | 16.47       | <.001         | High GH Physical = better domain status |
|                          | High              | 39 | 10.18 | 3.51 | 9.04            | 11.32       |               |                                         |
| Cognitive Abilities      | Low               | 82 | 9.41  | 2.40 | 8.89            | 9.94        | <.001         | High GH Physical = better domain status |
|                          | High              | 39 | 11.59 | 2.81 | 10.68           | 12.50       |               |                                         |
| Cognitive Function       | Low               | 82 | 9.50  | 3.47 | 8.74            | 10.26       | <.001         | High GH Physical = better domain status |
|                          | High              | 40 | 12.43 | 2.70 | 11.56           | 13.29       |               |                                         |
| Depression               | Low               | 81 | 16.47 | 6.02 | 15.14           | 17.80       | <.001         | High GH Physical = better domain status |
|                          | High              | 38 | 10.55 | 4.15 | 9.19            | 11.92       |               |                                         |
| Illness Burden           | Low               | 81 | 10.74 | 4.27 | 9.80            | 11.68       | <.001         |                                         |



|                           |      |    |       |      |       |       |       |                                         |
|---------------------------|------|----|-------|------|-------|-------|-------|-----------------------------------------|
|                           | High | 40 | 7.53  | 3.07 | 6.54  | 8.51  |       | High GH Physical = better domain status |
| Life Satisfaction         | Low  | 81 | 4.81  | 1.64 | 4.45  | 5.18  | <.001 | High GH Physical = better domain status |
|                           | High | 40 | 7.95  | 1.62 | 7.43  | 8.47  |       |                                         |
| <b>SOCIAL</b>             |      |    |       |      |       |       |       |                                         |
| Ability to Engage in SR&A | Low  | 80 | 13.53 | 5.48 | 12.30 | 14.75 | <.001 | High GH Physical = better domain status |
|                           | High | 36 | 21.72 | 5.26 | 19.94 | 23.50 |       |                                         |
| Independence              | Low  | 82 | 7.20  | 3.19 | 6.49  | 7.90  | <.001 | High GH Physical = better domain status |
|                           | High | 39 | 11.21 | 2.71 | 10.33 | 12.08 |       |                                         |
| Satisfaction with SR&A    | Low  | 80 | 13.53 | 4.46 | 12.53 | 14.52 | <.001 | High GH Physical = better domain status |
|                           | High | 40 | 23.50 | 5.47 | 21.75 | 25.25 |       |                                         |
| Social Isolation          | Low  | 82 | 6.55  | 1.98 | 6.11  | 6.98  | <.001 | High GH Physical = better domain status |
|                           | High | 39 | 4.05  | 1.65 | 3.52  | 4.59  |       |                                         |

ANOVA = Analysis of Variance

CI = Confidence Interval

GH = PROMIS Global Health

PROMIS = Patient-Reported Outcomes Measurement Information System

SD = Standard Deviation

SR&A = Social Roles and Activities

**Supplemental Table XV. ANOVA of PROMIS domains by PROMIS Global Health Mental (Low vs. High) using baseline data from 185 participants in the longitudinal sample**

| Domain Measure           | GH Mental Group | N  | Mean  | SD    | 95% CI for Mean |             | ANOVA p value | Result Interpretation                 |
|--------------------------|-----------------|----|-------|-------|-----------------|-------------|---------------|---------------------------------------|
|                          |                 |    |       |       | Lower Bound     | Upper Bound |               |                                       |
| <b>PHYSICAL</b>          |                 |    |       |       |                 |             |               |                                       |
| Dyspnea                  | Low             | 33 | 30.54 | 7.95  | 27.72           | 33.35       | <.001         | High GH Mental = better domain status |
|                          | High            | 52 | 22.97 | 9.61  | 20.30           | 25.65       |               |                                       |
| Fatigue                  | Low             | 41 | 44.12 | 7.10  | 41.88           | 46.36       | <.001         | High GH Mental = better domain status |
|                          | High            | 57 | 30.61 | 8.23  | 28.43           | 32.80       |               |                                       |
| Health Behavior Outcomes | Low             | 42 | 10.45 | 2.96  | 9.53            | 11.38       | 0.182         | No group difference                   |
|                          | High            | 57 | 11.21 | 2.62  | 10.51           | 11.91       |               |                                       |
| Pain Interference        | Low             | 42 | 6.81  | 2.11  | 6.15            | 7.47        | <.001         | High GH Mental = better domain status |
|                          | High            | 57 | 4.11  | 2.20  | 3.52            | 4.69        |               |                                       |
| Physical Function        | Low             | 42 | 24.00 | 7.89  | 21.54           | 26.46       | <.001         | High GH Mental = better domain status |
|                          | High            | 57 | 32.91 | 10.00 | 30.26           | 35.57       |               |                                       |
| Sleep Disturbance        | Low             | 42 | 23.31 | 5.23  | 21.68           | 24.94       | <.001         | High GH Mental = better domain status |
|                          | High            | 58 | 15.28 | 6.25  | 13.63           | 16.92       |               |                                       |
| Symptoms                 | Low             | 42 | 9.62  | 3.02  | 8.68            | 10.56       | <.001         | High GH Mental = better domain status |
|                          | High            | 58 | 6.71  | 2.51  | 6.05            | 7.37        |               |                                       |
| <b>MENTAL</b>            |                 |    |       |       |                 |             |               |                                       |
| Anger                    | Low             | 42 | 4.31  | 0.72  | 4.09            | 4.53        | <.001         | High GH Mental = better domain status |
|                          | High            | 58 | 2.72  | 1.04  | 2.45            | 3.00        |               |                                       |
| Anxiety                  | Low             | 42 | 17.36 | 3.88  | 16.15           | 18.56       | <.001         | High GH Mental = better domain status |
|                          | High            | 57 | 10.89 | 3.79  | 9.89            | 11.90       |               |                                       |
| Cognitive Abilities      | Low             | 42 | 8.98  | 2.33  | 8.25            | 9.70        | <.001         | High GH Mental = better domain status |
|                          | High            | 57 | 11.25 | 2.79  | 10.50           | 11.99       |               |                                       |
| Cognitive Function       | Low             | 42 | 8.29  | 3.34  | 7.25            | 9.33        | <.001         | High GH Mental = better domain status |
|                          | High            | 58 | 12.40 | 2.41  | 11.76           | 13.03       |               |                                       |
| Depression               | Low             | 42 | 19.52 | 5.07  | 17.94           | 21.10       | <.001         | High GH Mental = better domain status |
|                          | High            | 57 | 10.33 | 3.95  | 9.28            | 11.38       |               |                                       |
| Illness Burden           | Low             | 42 | 11.67 | 4.22  | 10.35           | 12.98       | <.001         |                                       |

|                           |      |    |       |      |       |       |       |                                       |
|---------------------------|------|----|-------|------|-------|-------|-------|---------------------------------------|
|                           | High | 58 | 7.67  | 3.18 | 6.84  | 8.51  |       | High GH Mental = better domain status |
| Life Satisfaction         | Low  | 42 | 4.38  | 1.36 | 3.96  | 4.80  | <.001 | High GH Mental = better domain status |
|                           | High | 58 | 7.19  | 1.92 | 6.68  | 7.70  |       |                                       |
| <b>SOCIAL</b>             |      |    |       |      |       |       |       |                                       |
| Ability to Engage in SR&A | Low  | 42 | 11.69 | 5.13 | 10.09 | 13.29 | <.001 | High GH Mental = better domain status |
|                           | High | 55 | 20.38 | 5.22 | 18.97 | 21.79 |       |                                       |
| Independence              | Low  | 42 | 6.76  | 2.95 | 5.84  | 7.68  | <.001 | High GH Mental = better domain status |
|                           | High | 57 | 9.86  | 2.92 | 9.09  | 10.63 |       |                                       |
| Satisfaction with SR&A    | Low  | 42 | 12.40 | 4.70 | 10.94 | 13.87 | <.001 | High GH Mental = better domain status |
|                           | High | 57 | 21.95 | 5.53 | 20.48 | 23.42 |       |                                       |
| Social Isolation          | Low  | 42 | 7.24  | 2.06 | 6.60  | 7.88  | <.001 | High GH Mental = better domain status |
|                           | High | 57 | 4.47  | 1.73 | 4.01  | 4.93  |       |                                       |

CI = Confidence Interval

GH = PROMIS Global Health

PROMIS = Patient-Reported Outcomes Measurement Information System

SD = Standard Deviation

SR&A = Social Roles and Activities

**Supplemental Figure 1. Flow diagram for longitudinal sample**

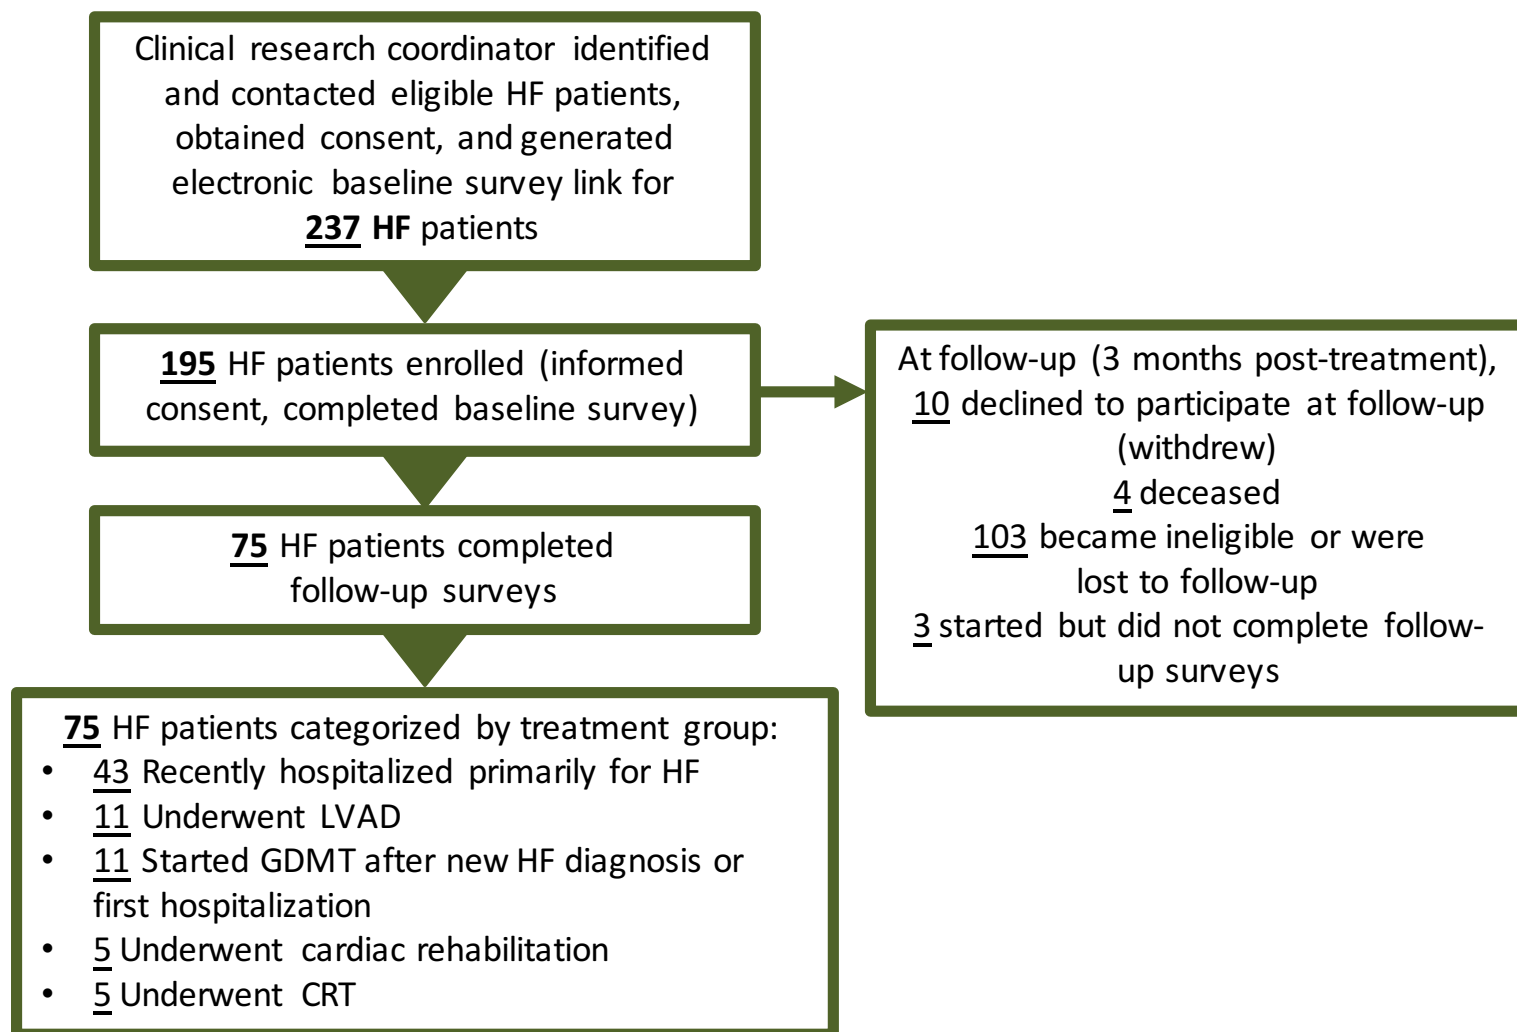

\* Verbal or written consent, depending on the Internal Review Board of record.

CRT = Cardiac resynchronization therapy; GDMT = Guideline-directed medical therapy; HF = Heart failure; LVAD = Left ventricular assist device

## Patient Focus Group Guide

**(Bold type = Instructions for moderator or observer, not to be read aloud)**

### **A. WELCOME**

**As participants arrive, invite them to pick up their name tent, help themselves to refreshments and have a seat. Ask them to complete consent form and participant information sheet (i.e., demographics). Collect forms before Introduction.**

### **B. INTRODUCTION**

**MODERATOR:** “I’d like to welcome you to this focus group session. My name is \_\_\_\_\_. I’ll be leading our discussion today.” **(Moderator says a little more about who she is and introduces anyone assisting her.)**

### **C. STUDY INFORMATION SHEET (OPTIONAL)**

**MODERATOR:** “Ok, before we get started, I want to make sure everyone received a focus group information sheet. This describes what this focus group is about, and what your participation entails. Are there any questions about this information?”

**Answer any question.**

### **E. GROUND RULES FOR DISCUSSION**

**MODERATOR:** “Before we get started, I would like to go over a few ground rules for our discussion:

1. You are the experts and we would like to know what YOU think. There are no right or wrong answers. It is OK to have a different opinion from others. Different opinions can be helpful to us understand multiple perspectives.
2. You don’t need to answer any questions you don’t want to. Your participation today is voluntary.
3. I’d like to turn on the voice recorder to make sure that we can accurately record what you say today. This information will not be matched to your actual name when it is typed. To help us keep track of the different voices, please say your name each time you speak. The name will not be transcribed – we will just use it to help us differentiate voices. The recording will be transcribed and reviewed by the researchers of this project. Later the tape will be erased. Is it OK with you if I record today’s session? I have two recorders

here – one is a backup. Now I am going to turn on the recorders. **[turn on recorders.]** I have just turned on the recorders – to repeat, is it OK if I record our session today? **[record voices saying yes].** Thank you.

5. The bathroom is located \_\_\_\_\_. If you have other needs, like if the room becomes too warm or too cold, please let us know. We will end at \_\_\_\_\_ today. Do you have any questions before we get started?

## **F. ICE BREAKER**

Let's start by going around the room and saying your name and say one thing about this item. **[pass out item – a photo of nature or actual pieces of nature (pebble, leaf, twig)]** There are no right or wrong answers, just something that comes to mind.

## **G. QUESTIONS**

1) We are here to learn from you what it is like to have your condition (OA-K/heart failure). Let's each write down how your life has changed since you began to have symptoms related to your condition (OA-K/heart failure). What you write about is up to you. It could include how having your condition has affected you physically, emotionally, socially, or with regard to how you function – at home and/or at work. I will give a few minutes for everyone to do some writing, and then you will have the choice of sharing what you wrote.

- Please take 5 minutes to think about this and write down how your life has changed.
- (Allow time)
- Who would like to share first?
- *Probing questions:* Can you give me an example? Can you explain this more? Have others experienced the same situation? Are there other things that come to mind?
- What would you say changed the most since developing your condition?
- (Additional question for OA-K group that has had surgery) What changed the most since having your surgery for better or worse?
- **Observer will keep track of domains (physical, emotional, social, cognitive, work life) and sub-topics using checklist below. Will share with Moderator after Question #2 for further exploration with participants.**

- **Note: if respondents begin to discuss issues related to healthcare experience (e.g., medication cost, access to care, communication with physician), please redirect conversation back to non-healthcare system issues.**

2) **Ask each participant to respond to following:** Given all the areas we have discussed, what would you say is your top, most important concern related to having your condition and why is it your top concern?

3) We've heard about \_\_\_ and \_\_\_\_\_. How about \_\_\_\_\_?

**Moderator will use checklist to decide on areas to cover in more depth**

**Preface areas with something like:** Others with HF/OA-K have talked about (fill in the blank). What has been your experience with this or thoughts about this?

4) **Ask each person:** We've now discussed many other experiences or concerns. Earlier we heard about everyone's top / major concern. Now I'm interested to know if you still have the same top concern or is it different and why?

5) Thinking about all of the topic areas we have discussed today, do you want to add any other thoughts or comments?

6) Now we are going to do several things on paper. We have given you two forms. On the first form, titled "Focus Groups: Additional Comments" please add any other final thoughts or comments that you may have that you would rather not share with the group today. These can be things that you have experienced that would be helpful for us to know about to better understand the symptoms related to your condition. What you write is up to you. It is OK to leave the paper blank. When you are done, please fold it in half and raise your hand and we will collect it and review at a later time. It will not be discussed today.

On the second piece of paper, please think of one goal you have related to your condition that is important for you to achieve. This might be a long or short term goal. Please write your goal in the space provided.

**Moderator will ask the following after everyone has completed both pieces of paper**

Do you think it would be helpful to discuss this kind of goal with your doctor? Why or why not?

7) Lastly, we have shared a packet with you. On each page, you will see a domain (e.g., physical function) with a list of items/activities related to the domain. We would like to know how important the items/activities are to you as someone with [heart failure/osteoarthritis].

Please complete two steps: First, in the column labeled Top 10, please put an “X” next to the items that are most important to you. You may select up to 10 items. Next, please review the items you selected and put an “X” in the column labeled Top 5 for the 5 that are the very most important to you as someone with [heart failure/osteoarthritis].

When you have finished, please bring your packet to **[gesture to location]** and we will give you your thank you gift at that time. If you have any questions, please don’t hesitate to ask.

Thank you so much! Your input today has been extremely helpful.



**PCORI Patient Focus group checklist: Check in box as topics are covered. Consider if topic has been discussed to sufficient degree—check box if “yes”**

**Physical**

|                                                              | Covered | Sufficient time spent on topic? | Follow-up questions needed/suggested |
|--------------------------------------------------------------|---------|---------------------------------|--------------------------------------|
| Ability to move around (e.g., walking climbing ladder, etc.) |         |                                 |                                      |
| Activities that require strength (e.g., carrying things)     |         |                                 |                                      |
| Routine daily activities/self-care (e.g., showering, etc.)   |         |                                 |                                      |
| Exercise or sports activities                                |         |                                 |                                      |
|                                                              |         |                                 |                                      |
| Fatigue/tiredness                                            |         |                                 |                                      |
|                                                              |         |                                 |                                      |
| Pain (severity)                                              |         |                                 |                                      |
|                                                              |         |                                 |                                      |
| Pain (limitations)                                           |         |                                 |                                      |
|                                                              |         |                                 |                                      |
| Sleep (quality, quantity)                                    |         |                                 |                                      |
|                                                              |         |                                 |                                      |
| Other                                                        |         |                                 |                                      |

**PCORI Patient Focus group checklist: Check in box as topics are covered. Consider if topic has been discussed to sufficient degree—check box if “yes”**

**Emotional**

|                        | Covered | Sufficient time spent on topic? | Follow-up questions needed/suggested |
|------------------------|---------|---------------------------------|--------------------------------------|
| Sadness/depression     |         |                                 |                                      |
| Worry/anxiety          |         |                                 |                                      |
|                        |         |                                 |                                      |
| Frustration            |         |                                 |                                      |
|                        |         |                                 |                                      |
| Fatigue/tiredness      |         |                                 |                                      |
|                        |         |                                 |                                      |
| Dependency             |         |                                 |                                      |
|                        |         |                                 |                                      |
| Self-worth/self-esteem |         |                                 |                                      |
|                        |         |                                 |                                      |
| Other                  |         |                                 |                                      |

**PCORI Patient Focus group checklist: Check in box as topics are covered. Consider if topic has been discussed to sufficient degree—check box if “yes”**

**Social**

|                                                                      | Covered | Sufficient time spent on topic? | Follow-up questions needed/suggested |
|----------------------------------------------------------------------|---------|---------------------------------|--------------------------------------|
| Ability to socialize/visit with family, friends, co-workers          |         |                                 |                                      |
| Relationship with partner (may include love life/sexual functioning) |         |                                 |                                      |
| Satisfaction with socialization                                      |         |                                 |                                      |
|                                                                      |         |                                 |                                      |
| Isolation                                                            |         |                                 |                                      |
|                                                                      |         |                                 |                                      |
| Dependency                                                           |         |                                 |                                      |
|                                                                      |         |                                 |                                      |
| Ability to travel (local or long distance)                           |         |                                 |                                      |
|                                                                      |         |                                 |                                      |
| Interest in hobbies, job, etc.                                       |         |                                 |                                      |
|                                                                      |         |                                 |                                      |
| Other                                                                |         |                                 |                                      |

**PCORI Patient Focus group checklist: Check in box as topics are covered. Consider if topic has been discussed to sufficient degree—check box if “yes”**

**Cognitive**

|                          | Covered | Sufficient time spent on topic? | Follow-up questions needed/suggested |
|--------------------------|---------|---------------------------------|--------------------------------------|
| Memory                   |         |                                 |                                      |
|                          |         |                                 |                                      |
| Ability to think clearly |         |                                 |                                      |
|                          |         |                                 |                                      |
| Ability to think quickly |         |                                 |                                      |
|                          |         |                                 |                                      |
| Fatigue/tiredness        |         |                                 |                                      |
|                          |         |                                 |                                      |
| Other                    |         |                                 |                                      |

**PCORI Patient Focus group checklist: Check in box as topics are covered. Consider if topic has been discussed to sufficient degree—check box if “yes”**

**Work**

|                             | Covered | Sufficient time spent on topic? | Follow-up questions needed/suggested |
|-----------------------------|---------|---------------------------------|--------------------------------------|
| Routine tasks               |         |                                 |                                      |
|                             |         |                                 |                                      |
| Inability to work           |         |                                 |                                      |
|                             |         |                                 |                                      |
| Employer/colleague response |         |                                 |                                      |
|                             |         |                                 |                                      |
| Other                       |         |                                 |                                      |

## Provider Interview Guide

(**Bold type = Instructions for moderator or observer, not to be read aloud**)

**Assume that the rating scales for providers who agree to be interviewed will be conducted via an online survey platform prior to the interview. If the provider has not completed this by the time of the interview and the interview is being conducted in person, then the interviewer will bring along a paper copy of the instrument in hopes of having the provider fill it out then. If the interview is being conducted over the phone and the provider has not yet completed the instrument, then the interviewer will remind them to please complete the ratings.**

Thank you for agreeing to share your expertise on (OA-K/heart failure). Specifically, we are interested in knowing your thoughts about the impact of this condition on patients' lives.

### *Intro researcher*

#### *Permission to Record -- Assure Confidentiality*

- 1) To begin, could you share a bit about your background related to caring for patients with (OA-K/heart failure)?
- 2) How long have you been treating patients with osteoarthritis/heart failure?
- 3) Approximately how many OA-K/Heart failure patients do you see per month?
- 4) Thinking about your patients with (OA-K/heart failure) what would you say are the primary ways in which their daily lives change after developing the condition? This could include how their condition affects them physically, emotionally, socially, or how it impacts their ability to function at home and/or at work. Please list any that you can think of for these patients.
  - Are these different for different patients? In what ways?
  - **For OA-K providers if they don't say:** What would you say are the primary ways their life changes after treatment, such as surgery, particularly during the months just after surgery?
- 3) From your experience, which of the changes that you talked about are most concerning for patients?
  - Are these different for different patients? In what ways?
- 4) As a provider, what patient concerns or daily life changes are most important for you or your healthcare team to know about when caring for these patients?
